# Supplementary material for: Solvent-free synthesis of monodisperse Cu nanoparticles by thermal decomposition of an oleylamine-coordinated Cu oxalate complex
Source: Royal Society of Chemistry journal article supplement (doi:10.1039/c8dt00345a), 2018-01-01
Supplement: c8dt00345a1.pdf [file c8dt00345a1.pdf]

## Supporting information

### **Solvent-free Synthesis of Monodisperse Cu Nanoparticles by Thermal Decomposition of Oleylamine-coordinated Cu Oxalate Complex**

Takanari Togashi, Masato Nakayama, Atsuki Hashimoto, Manabu Ishizaki, Katsuhiko Kanaizuka, Masato Kurihara

*Department of Materials and Biological Chemistry, Faculty of Science, Yamagata*

*University, 1-4-12 Kojirakawa-machi, Yamagata 990-8560*

Figure 1 shows the FTIR spectra of N,N-diethyl-1,3-diaminopropane (dedap) and  $[\text{Cu}(\text{ox})(\text{dedap})_2]$  reported in Ref 23. The two amino-group-related peaks in the FTIR spectrum of dedap observed at 3364 ( $\nu_s(\text{NH}_2)$ ) and 3290  $\text{cm}^{-1}$  ( $\nu_{\text{as}}(\text{NH}_2)$ ) are shifted to lower wavenumbers, 3250 ( $\nu_s(\text{NH}_2)$ ) and 3150  $\text{cm}^{-1}$  ( $\nu_{\text{as}}(\text{NH}_2)$ ) for  $[\text{Cu}(\text{ox})(\text{dedap})_2]$ . In addition, two strong and sharp bands at 1655 and 1593  $\text{cm}^{-1}$  characterized as asymmetric vibration of  $[\text{Cu}(\text{ox})(\text{dedap})_2]$  are observed as OA-Cu(ox).

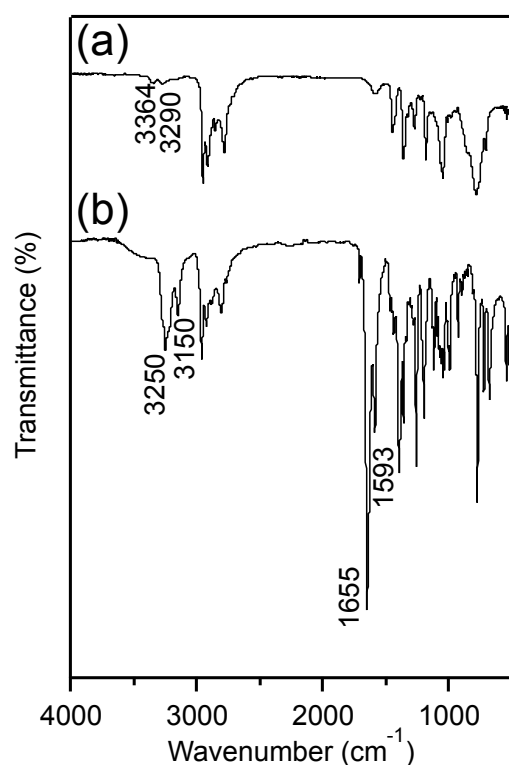

Figure S1. FTIR transmittance spectrum of (a) dedap and (b)  $[\text{Cu}(\text{ox})(\text{dedap})_2]$ .

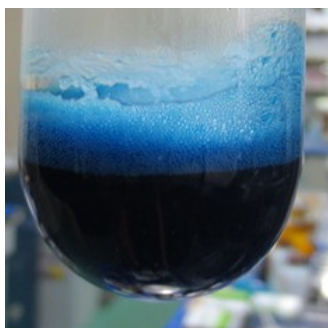

Figure S2. Photograph of the precursor after mixing at 140 °C for 20 min.

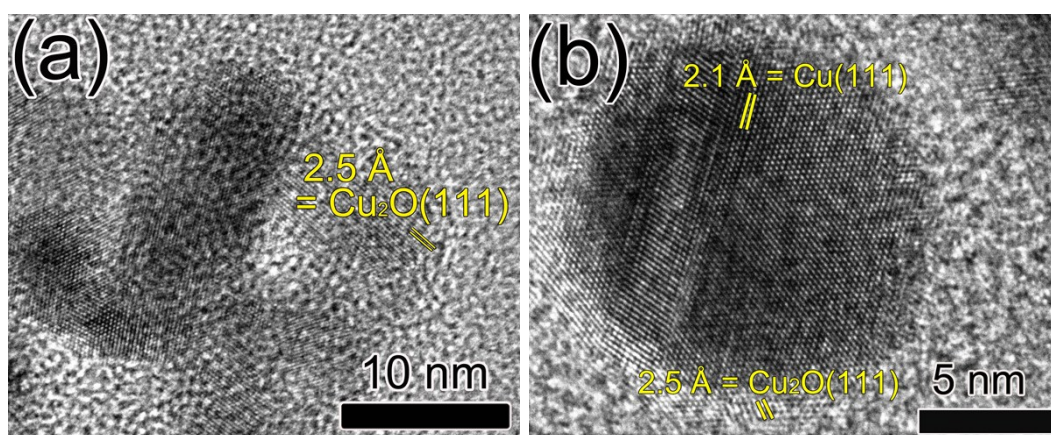

Figure S3. TEM images of the synthesized Cu and  $\text{Cu}_2\text{O}$  nanocrystals synthesized at  $200^\circ\text{C}$  and a Cu nanocrystal synthesized at  $260^\circ\text{C}$ .

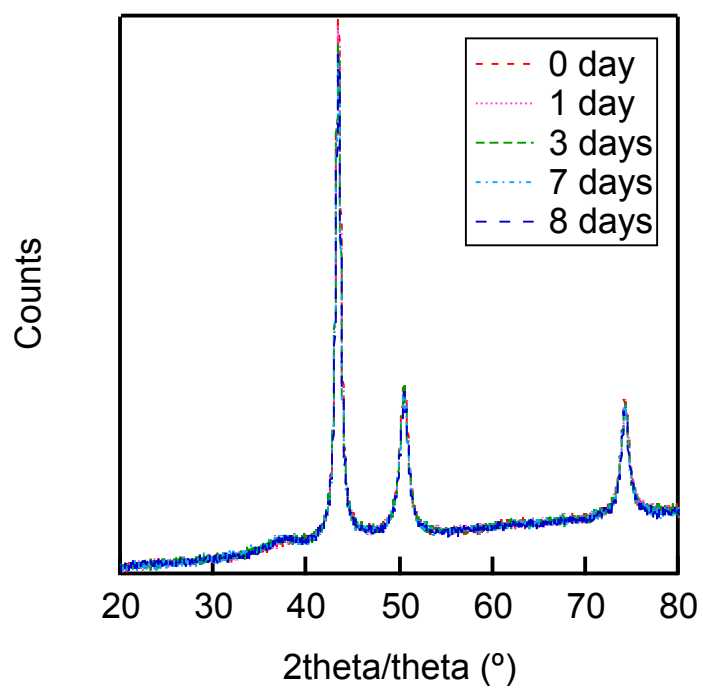

Figure S4. Time-course XRD measurement of Cu NPs Synthesized at  $260^\circ\text{C}$ .

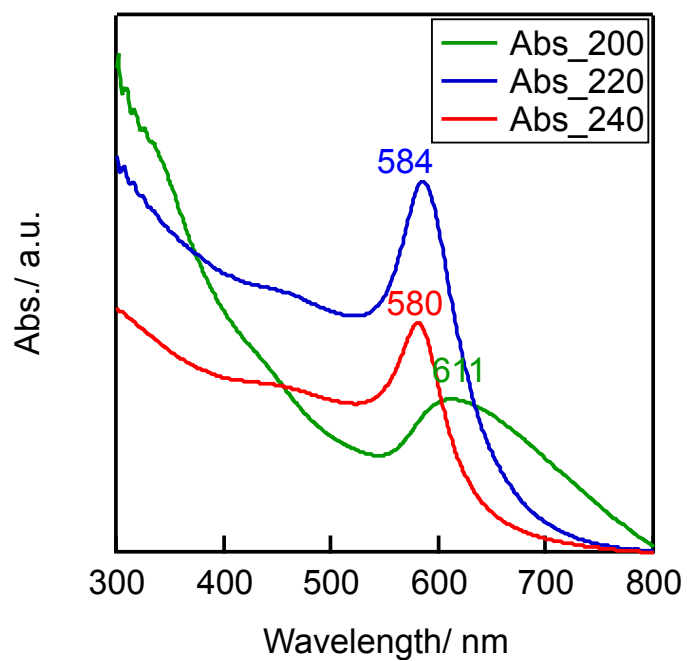

Figure S5. UV-vis spectrum of toluene dispersion of Cu NPs synthesized at 200 (green), 220 (blue), and 240 °C (red)
